# Supplementary material for: Synthesis and crystal structure of a new 1D metal–organic coordination polymer with Cu2+ ions based on a chiral terephthalic acid derivative synthesized for the first time
Source: Royal Society of Chemistry journal article supplement (doi:10.1039/d4ce00408f), 2024-01-01
Supplement: d4ce00408f1.pdf [file d4ce00408f1.pdf]

Electronic Supplementary Information

**Synthesis and the Crystal Structure of a new 1D Metal–Organic Coordination Polymer with Cu<sup>2+</sup> ions based on a Chiral Terephthalic Acid Derivative synthesized for the first time**

Vladimir V. Veselovsky,<sup>\*a</sup> Vera I. Isaeva,<sup>a</sup> Vera D. Nissenbaum<sup>a</sup> and Vladimir V. Chernyshev<sup>b,c</sup>

<sup>a</sup> N.D. Zelinsky Institute of Organic Chemistry, Russian Academy of Sciences, Leninsky prospect 47, Moscow 119991, Russia

<sup>b</sup> Department of Chemistry, M.V. Lomonosov Moscow State University, 1-3 Leninskie Gory, Moscow 119991, Russia

<sup>c</sup> A.N. Frumkin Institute of Physical Chemistry and Electrochemistry, Russian Academy of Sciences, Building 4, 31 Leninsky prospect, Moscow 119071, Russia

**Content**

**I. HPLC analysis data**

**II. Thermal stability of the {Cu[bdc-(N-MePro)H<sub>2</sub>O]•0.25H<sub>2</sub>O}<sub>n</sub> polymer**

**III. FTIR Studies of the {Cu[bdc-(N-MePro)H<sub>2</sub>O]•0.25H<sub>2</sub>O}<sub>n</sub> polymer**

**IV. Structural stability of the {Cu[bdc-(N-MePro)H<sub>2</sub>O]•0.25H<sub>2</sub>O}<sub>n</sub> catalytic material**

## I. HPLC analysis data

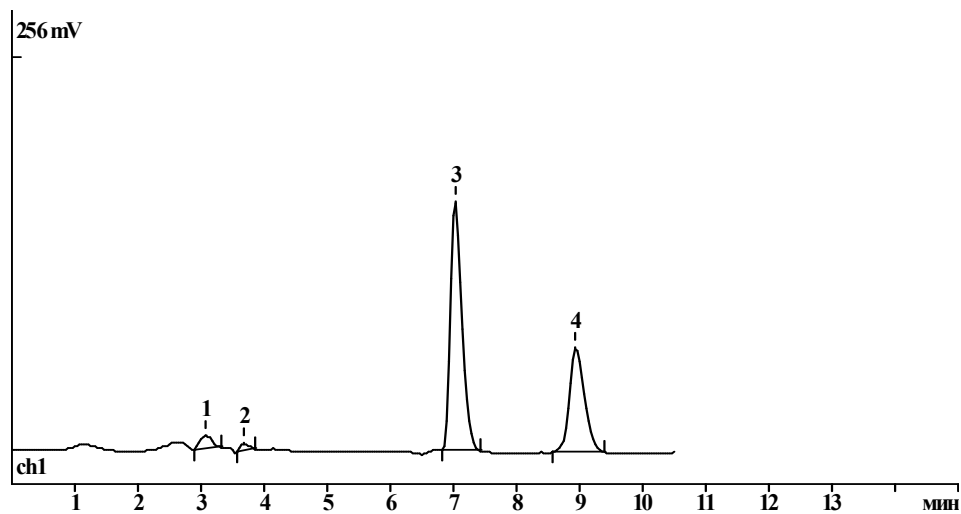

| Peak No | Index Time (min) | Area (mV/sec) | Area (%) |
|---------|------------------|---------------|----------|
| 1       | 3.07             | 104.55        | 3.38     |
| 2       | 3.67             | 48.13         | 1.56     |
| 3       | 7.03             | 1898.99       | 61.44    |
| 4       | 8.94             | 1039.15       | 33.62    |
| Total   | 10.52            | 3090.83       | 100.00   |

**Figure S1.** HPLC analysis of residual non-racemic styrene oxide **4** remaining after reaction completion.

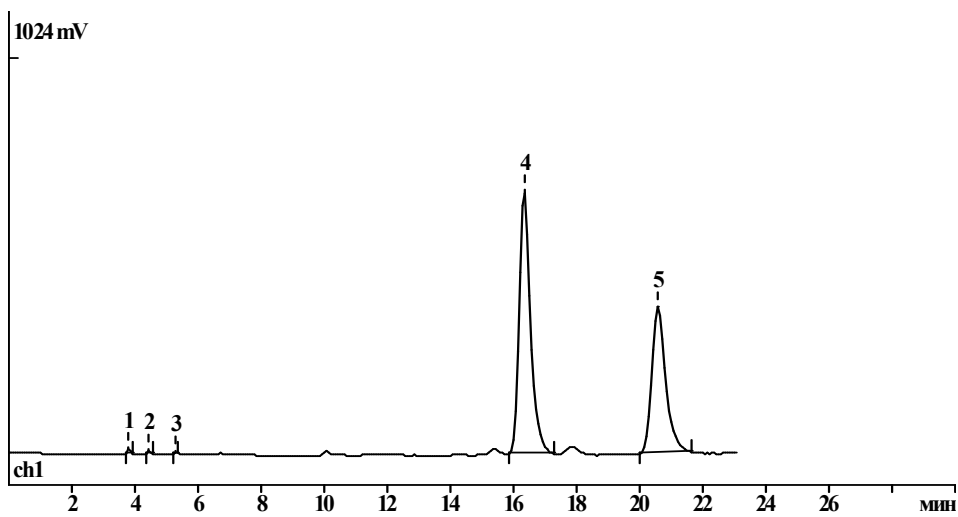

| Peak No | Index Time (min) | Area (mV/sec) | Area (%) |
|---------|------------------|---------------|----------|
| 1       | 3.80             | 81.56         | 0.31     |
| 2       | 4.45             | 44.98         | 0.17     |
| 3       | 5.28             | 16.15         | 0.06     |
| 4       | 16.34            | 15633.40      | 58.95    |
| 5       | 20.58            | 10743.44      | 40.51    |
| Total   | 23.11            | 26519.52      | 100.00   |

**Figure S2.** HPLC analysis of isolated non-racemic aminoalcohol **5**.

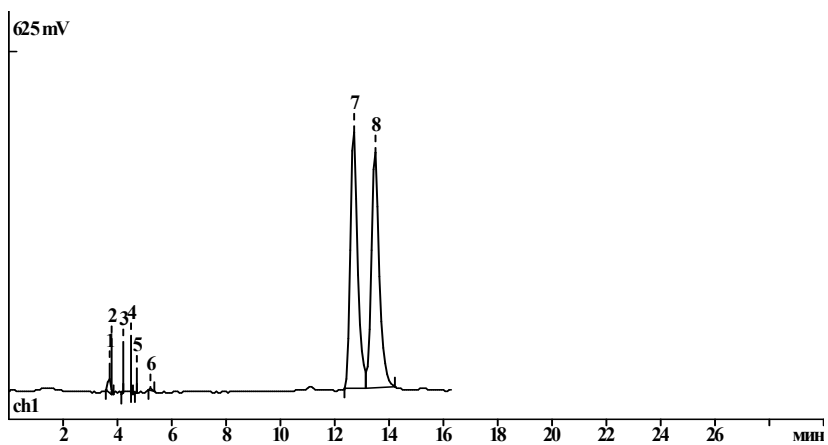

| Peak No | Index Time (min) | Area (mV/sec) | Area (%) |
|---------|------------------|---------------|----------|
| 1       | 3.70             | 213.16        | 1.26     |
| 2       | 3.80             | 75.81         | 0.45     |
| 3       | 4.19             | 56.48         | 0.33     |
| 4       | 4.52             | 61.61         | 0.36     |
| 5       | 4.68             | 26.86         | 0.16     |
| 6       | 5.24             | 25.67         | 0.15     |
| 7       | 12.69            | 8291.48       | 48.91    |
| 8       | 13.48            | 8201.34       | 48.38    |
| Total   | 16.32            | 16952.41      | 100.00   |

**Figure S3.** HPLC analysis of isolated non-racemic aminoalcohol **8**.

## II. Thermal stability of the $\{\text{Cu}[\text{bdc}-(\text{N-MePro})\text{H}_2\text{O}]\cdot 0.25\text{H}_2\text{O}\}_n$ polymer

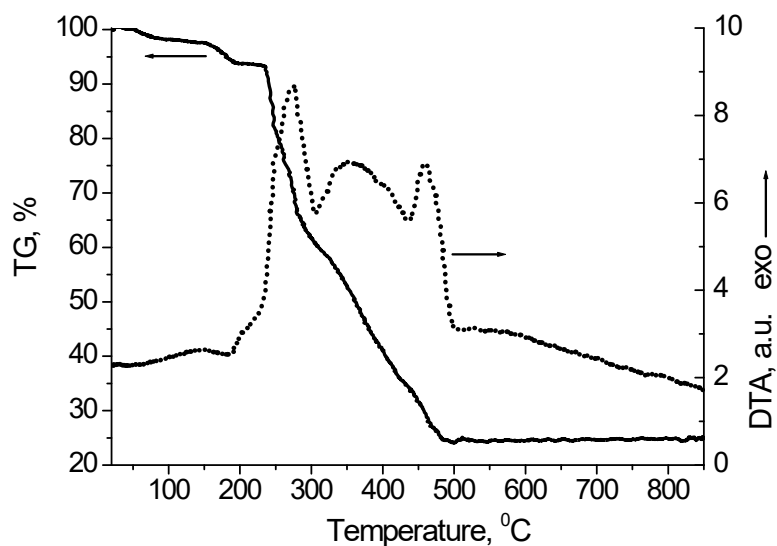

Figure S4. TG, DTA curves for  $\{\text{Cu}[\text{bdc}-(\text{N-MePro})\text{H}_2\text{O}]\cdot 0.25\text{H}_2\text{O}\}_n$  polymer.

## III. FTIR Studies of the $\{\text{Cu}[\text{bdc}-(\text{N-MePro})\text{H}_2\text{O}]\cdot 0.25\text{H}_2\text{O}\}_n$ polymer

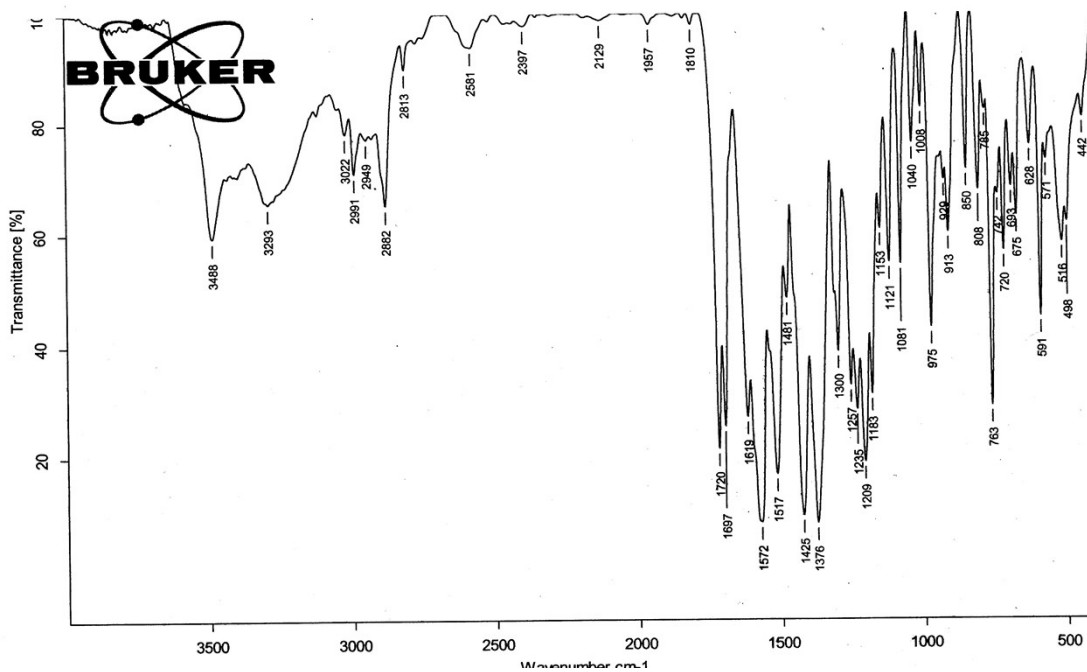

Figure S5. FTIR spectrum of the  $\{\text{Cu}[\text{bdc}-(\text{N-MePro})\text{H}_2\text{O}]\cdot 0.25\text{H}_2\text{O}\}_n$  polymer.

#### IV. Structural stability of the $\{\text{Cu}[\text{bdc}-(\text{N-MePro})\text{H}_2\text{O}]\cdot 0.25\text{H}_2\text{O}\}_n$ catalytic material

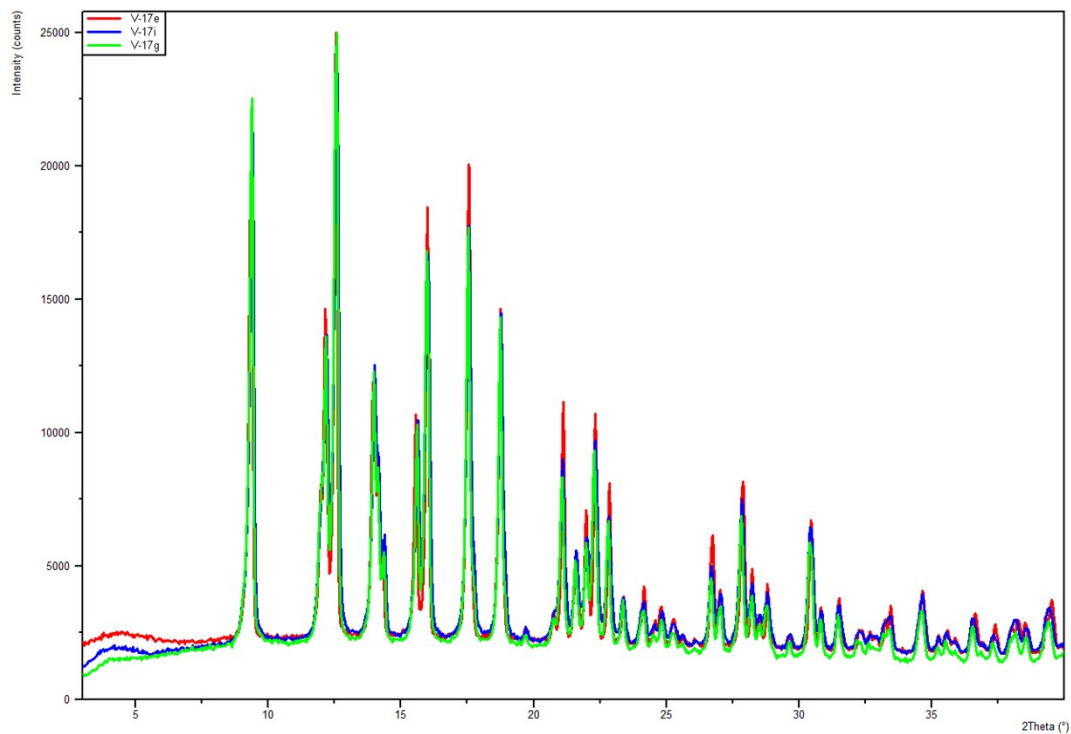

**Figure S6.** PXRD patterns of the  $\{\text{Cu}[\text{bdc}-(\text{N-MePro})\text{H}_2\text{O}]\cdot 0.25\text{H}_2\text{O}\}_n$  polymer before (red) and after catalytic reactions of ring opening of styrene oxide (blue) and cyclohexene oxide (green).
